# Supplementary material for: Magnetic particle-based super-hydrophobic coatings with excellent anti-icing and thermoresponsive deicing performance
Source: Royal Society of Chemistry journal article supplement (doi:10.1039/c5ta05277g), 2015-01-01
Supplement: c5ta05277g1.pdf [file c5ta05277g1.pdf]

## Electronic Supplementary Information (ESI)

### Magnetic Particles-based Super-Hydrophobic Coatings with Excellent Anti-icing and Thermo-responsive Deicing Performances

Table s1. The Compositions of the Hybrid Coatings

| samples                          | MNP-0 | MNP-10 | MNP-30 | MNP-50 |
|----------------------------------|-------|--------|--------|--------|
| copolymer solution(g)            | 3.33  | 3.0    | 2.33   | 1.67   |
| curing agent solution (g)        | 0.33  | 0.27   | 0.21   | 0.15   |
| MNP@NH <sub>2</sub> solution (g) | 0.00  | 1.00   | 3.00   | 5.00   |

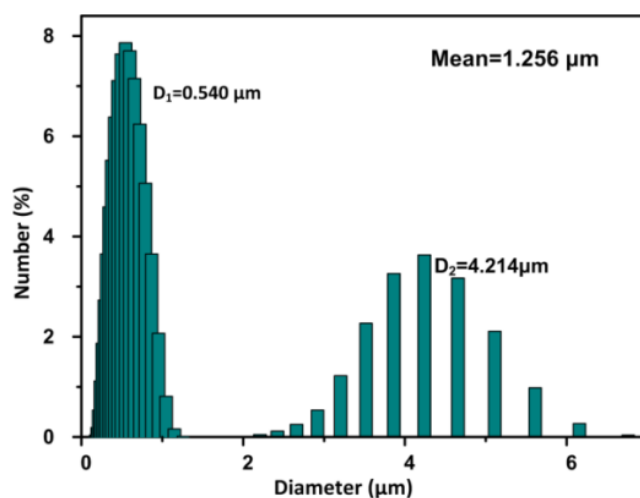

Fig. s1 Size distribution of MNP@NH<sub>2</sub> dispersed in ethanol dispersions. Two hydrodynamic values, 0.540 μm (82.1%) and 4.214 μm (17.9%), appeared in the curve. This indicates the presence of small clusters consisting of nanoparticles.

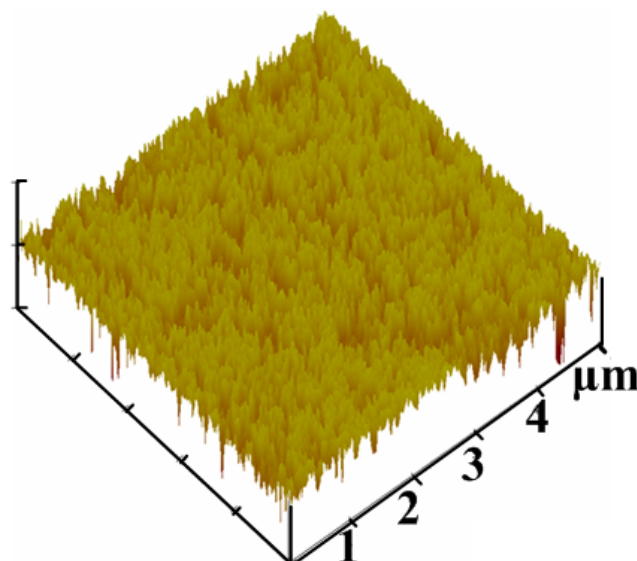

Fig. s2 The typical three dimensional AFM phase images of MNP-50. In addition, the nano-scale phase separation was obviously observed on the MNP-50 sample.

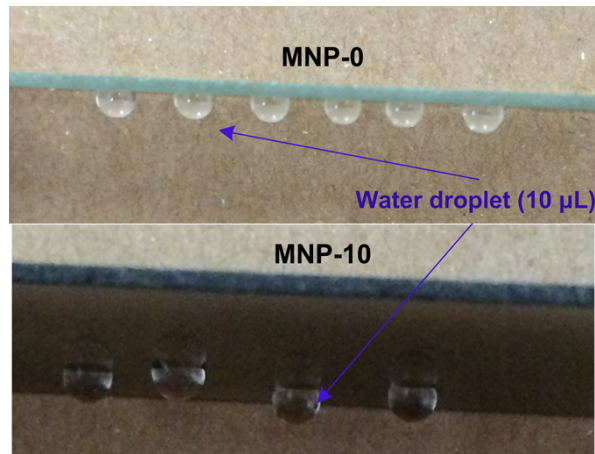

Fig. s3 The water droplet was pinned firmly on the MNP-0 and MNP-10 surfaces at a tilted angle of  $180^\circ$ . Water droplets could not roll-off the MNP-0 and MNP-10 surfaces by overturn the surface. Thus the sliding angles of the MNP-0 and MNP-10 could not be recorded.
